# Supplementary material for: Unravelling the strain-promoted [3+2] cycloaddition reactions of phenyl azide with cycloalkynes from the molecular electron density theory perspective
Source: Royal Society of Chemistry journal article supplement (doi:10.1039/d0nj02711a), 2020-01-01
Supplement: d0nj02711a1.pdf [file d0nj02711a1.pdf]

## Electronic Supplementary Information

### Unravelling the Strain-Promoted [3+2] Cycloaddition Reactions of Phenyl Azide with Cycloalkynes within the Molecular Electron Density Theory Perspective

Luis R Domingo<sup>1\*</sup> and Nivedita Acharjee<sup>2</sup>

<sup>1</sup> Department of Organic Chemistry, University of Valencia, Dr. Moliner 50, Burjassot, E-46100 Valencia, Spain; Contact: domingo@utopia.uv.es

<sup>2</sup> Department of Chemistry, Durgapur Government College, J. N. Avenue, Durgapur-, West Bengal 713214, India; Contact: nivchem@gmail.com

#### Index

- S1** BET study of the 32CA reaction of phenyl azide **3** with cyclohexyne **C6**.
- S5** BET study of the 32CA reaction of phenyl azide **3** with 2-butyne **13**.
- S8** References.
- S9** Figure with the natural atomic charges of the reagents.
- S10** Table with the MPWB1K/6-311G(d,p) calculated CDFT indices at the ground state of the reagents.
- S10** Figure with plot of the MPWB1K/6-311G(d,p) gas phase electrophilicity  $\omega$  indices vs the B3LYP/6-31G(d) ones of phenyl azide **3**, cycloalkynes **C5 - C9** and 2-butyne **13**.
- S11** Table with the MPWB1K/6-311G(d,p) calculated electronic energies, enthalpies and Gibbs free energies, in kcal·mol<sup>-1</sup>, computed at 298 K in gas phase of the stationary points involved in the 32CA reactions of phenyl azide **3** with cycloalkyne series **C5 - C9** and 2-butyne **13**.
- S12** Table with the MPWB1K/6-311G(d,p) calculated electronic energies, enthalpies and Gibbs free energies, in kcal·mol<sup>-1</sup>, computed at 298 K in acetonitrile of the stationary points involved in the 32CA reactions of phenyl azide **3** with cycloalkyne series **C5 - C9** and 2-butyne **13**.

### 1. BET study of the 32CA reaction of phenyl azide **3** with cyclohexyne **C6**

The Bonding evolution theory<sup>1</sup> (BET) comes from the conjunction of ELF topological analysis<sup>2,3</sup> and Thom's Catastrophe theory<sup>4</sup> and has proven to be a very useful methodological tool to establish the nature of the electronic rearrangement associated along the reaction path.<sup>5</sup> Herein, the BETs of the 32CA reactions of phenyl azide **3** with cyclohexyne **C6** and with 2-butyne **13** are studied.

The 32CA reaction of phenyl azide **3** with **C6** takes place along eight different phases (see Table S1). *Phase I* starts at **S0-I**,  $d_{C4-N3} = 2.97 \text{ \AA}$  and  $d_{C5-N1} = 2.64 \text{ \AA}$ , which corresponds with the first structure of the IRC. ELF of **S0-I** is similar to that of the separated reagents (see section 3.1), except the formation of monosynaptic  $V(C4)$  integrating at 1.04 e, which mainly comes from the depopulation of the electron density of C4-C4' single bond adjacent to the alkyne framework. The disynaptic basin  $V(C4,C4')$  undergoes depopulation from 2.71 e in **1** to 1.90 e in **S0-I**.

The short phase *Phase II* starts at **S1-I**,  $d_{C4-N3} = 2.93 \text{ \AA}$  and  $d_{C5-N1} = 2.59 \text{ \AA}$ . The two  $V(N2,N3)$  and  $V'(N2,N3)$  disynaptic basins present at **S0-I** have merged into a new  $V(N2,N3)$  disynaptic basin, integrating 4.26 e. The short phase *Phase III* starts at **S2-I**,  $d_{C4-N3} = 2.80 \text{ \AA}$  and  $d_{C5-N1} = 2.49 \text{ \AA}$ . The disynaptic  $V(C4,C5)$  disynaptic basins present at **S1-I** has split into a two disynaptic basins  $V(C4,C5)$  and  $V'(C4,C5)$ , respectively integrating at 2.24 e and 2.23 e.

*Phase IV* starts at **S3-I**,  $d_{C4-N3} = 2.71 \text{ \AA}$  and  $d_{C5-N1} = 2.43 \text{ \AA}$ , which is characterised by the creation of a new  $V(N2)$  monosynaptic basin, integrating 0.47 e, associated with the formation of a lone pair at the N2 nitrogen. The electron density of this lone pair mainly comes from the depopulation of the N1-N2 and N2-N3 bonding regions along *Phase III*. In this phase, **TS1** is found. These bonding changes demand an energy cost of 2.2 kcal·mol<sup>-1</sup>.

*Phase V* starts at **S4-I**,  $d_{C4-N3} = 2.20 \text{ \AA}$  and  $d_{C5-N1} = 1.98 \text{ \AA}$ , which is characterised by the creation of a new  $V(C5)$  monosynaptic basin, integrating 0.18 e, associated with the formation of a *pseudoradical* center at the C5 carbon. Together with this change, the  $V(C4,C5)$  disynaptic basin experiences a depopulation of 0.30 e along *Phase IV*.

*Phase VI* starts at **S5-I**,  $d_{C4-N3} = 2.13 \text{ \AA}$  and  $d_{C5-N1} = 1.91 \text{ \AA}$ . At the beginning of this phase the first more relevant change along the IRC takes place. At this structure, while the  $V(C5)$  monosynaptic basin present at **S4-I** is missing, a new  $V(N1,C5)$  disynaptic basin, integrating 1.39 e, is created. This topological changes indicate that the formation of the first

N1-C5 single bond has begun at a C–N distance of 1.91 Å. Together with this change, the monosynaptic V(N1) basin experiences a depopulation of 1.10 e along *Phase V*.

*Phase VII* starts at **S6-I**,  $d_{C4-N3} = 1.95$  Å and  $d_{C5-N1} = 1.73$  Å. At this structure, the V(N3) monosynaptic basin present at **S5-I** splits in two V(N3) and V'(N3) monosynaptic basins, integrating 3.34 e and 0.40 e, respectively.

**Table S1.** ELF valence basin populations, distances of the forming bonds, and relative<sup>a</sup> electronic energies of the gas phase IRC structures **S0-I** – **S7-I** defining the eight phases characterizing the molecular mechanism of the 32CA reaction between phenyl azide **3** with cyclohexyne **C6** yielding 1,2,3-triazole **8**. Distances are given in angstroms, Å, and relative energies in kcal·mol<sup>-1</sup>.

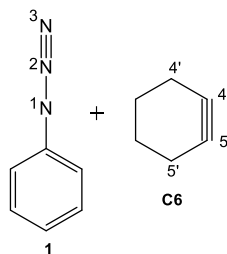

| Phases     | <i>I</i>    | <i>II</i>   | <i>III</i>  | <i>IV</i>   | <i>V</i>    | <i>VI</i>   | <i>VII</i>  | <i>VIII</i> |          |
|------------|-------------|-------------|-------------|-------------|-------------|-------------|-------------|-------------|----------|
| Structures | <b>S0-I</b> | <b>S1-I</b> | <b>S2-I</b> | <b>S3-I</b> | <b>S4-I</b> | <b>S5-I</b> | <b>S6-I</b> | <b>S7-I</b> | <b>8</b> |
| d(C4–N3)   | 2.968       | 2.925       | 2.796       | 2.713       | 2.200       | 2.134       | 1.951       | 1.727       | 1.348    |
| d(C5–N1)   | 2.635       | 2.594       | 2.493       | 2.431       | 1.979       | 1.912       | 1.727       | 1.551       | 1.351    |
| ΔE         | 0.0         | 0.3         | 1.4         | 2.2         | -3.9        | -8.9        | -29.2       | -58.8       | -115.0   |
| V(N1)      | 3.30        | 3.29        | 3.27        | 3.26        | 3.30        | 2.20        | 2.00        | 1.83        | 1.18     |
| V'(N2)     |             |             |             | 0.47        | 2.24        | 2.35        | 2.59        | 2.79        | 3.13     |
| V(N1,N2)   | 2.48        | 2.47        | 2.40        | 2.33        | 1.75        | 1.72        | 1.67        | 1.65        | 1.74     |
| V(N2,N3)   | 1.65        | 4.26        | 4.34        | 3.96        | 2.87        | 2.80        | 2.65        | 2.48        | 2.08     |
| V'(N2,N3)  | 2.59        |             |             |             |             |             |             |             |          |
| V(N3)      | 3.66        | 3.65        | 3.64        | 3.63        | 3.64        | 3.66        | 3.34        | 3.10        | 2.88     |
| V'(N3)     |             |             |             |             |             |             | 0.40        |             |          |
| V(C4,C5)   | 4.47        | 4.47        | 2.24        | 2.29        | 2.07        | 2.03        | 1.97        | 1.89        | 3.47     |
| V'(C4,C5)  |             |             | 2.23        | 2.16        | 2.08        | 2.05        | 1.95        | 1.94        |          |
| V(C4,C4')  | 1.90        | 1.89        | 1.88        | 1.87        | 1.94        | 1.96        | 2.01        | 2.04        | 2.08     |
| V(C5,C5')  | 2.41        | 2.40        | 2.39        | 2.38        | 2.26        | 2.19        | 2.11        | 2.08        | 2.11     |
| V(C4)      | 1.04        | 1.06        | 1.10        | 1.13        | 1.16        | 1.15        | 1.05        |             |          |
| V(C5)      |             |             |             |             | 0.18        |             |             |             |          |
| V(N3,C4)   |             |             |             |             |             |             |             | 1.66        | 2.28     |
| V(N1,C5)   |             |             |             |             |             | 1.39        | 1.77        | 2.03        | 2.41     |

Finally, the last *Phase VIII* starts at **S7-I**,  $d_{C4-N3} = 1.73 \text{ \AA}$  and  $d_{C5-N1} = 1.55 \text{ \AA}$ , and ends at 1,2,3-triazole **6**,  $d_{C4-N3} = 1.35 \text{ \AA}$  and  $d_{C5-N1} = 1.35 \text{ \AA}$ . At **S7-I** the second more relevant change along the IRC takes place. At this structure, while the  $V(C4)$  and  $V'(N3)$  monosynaptic basins are missing, a new  $V(N3,C4)$  disynaptic basin, integrating 1.66 e, is created. These relevant topological changes indicate that the formation of the second N3–C4 single bond has begun at a C–N distance of  $1.73 \text{ \AA}$ , through the C-to-N coupling of the electron density of the C4 *pseudoradical* carbon (integrating 1.05 e) and part of the non-bonding electron density of the N3 nitrogen. Along this last phase, the molecular electron density is relaxed to reach the structure of 1,2,3-triazole **8**, in which the population of the  $V(N3,C4)$  and  $V(N1,C5)$  disynaptic basins reach a population of 2.28 and 2.41 e, respectively.

## 2. BET study of the 32CA reaction of phenyl azide **3** with 2-butyne **13**

The 32CA reaction of phenyl azide **3** with 2-butyne **13** takes place along nine different phases (see Table S2). *Phase I* starts at **S0-II**,  $d_{C4-N3} = 3.02 \text{ \AA}$  and  $d_{C5-N1} = 2.91 \text{ \AA}$ , which corresponds with the first structure of the IRC. ELF of **S0-II** is similar to that of the separated reagents (see section 3.1).

The short phase *Phase II* starts at **S1-II**,  $d_{C4-N3} = 2.78 \text{ \AA}$  and  $d_{C5-N1} = 2.72 \text{ \AA}$ . At this structure the two  $V(N2,N3)$  and  $V'(N2,N3)$  disynaptic basins present at **S0-II** have merged into a  $V(N2,N3)$  disynaptic basin, integrating 4.21 e. This phase demands an energy cost of  $3.8 \text{ kcal}\cdot\text{mol}^{-1}$ .

*Phase III* starts at **S2-II**,  $d_{C4-N3} = 2.53 \text{ \AA}$  and  $d_{C5-N1} = 2.55 \text{ \AA}$ , which is characterised by the creation of a new  $V(N2)$  monosynaptic basin, integrating 0.58 e, associated with the formation of a lone pair at the N2 nitrogen. The electron density of this lone pair mainly comes from the depopulation of the N1–N2 and N2–N3 bonding regions, which experience depopulation of 0.15 e and 0.41 e along *Phase II*. These bonding changes demand an energy cost of  $10.9 \text{ kcal}\cdot\text{mol}^{-1}$ .

The short phase *Phase IV* starts at **S3-II**,  $d_{C4-N3} = 2.32 \text{ \AA}$  and  $d_{C5-N1} = 2.41 \text{ \AA}$ . At **S3-II** the  $V(C4,C5)$  disynaptic basin is split in two new disynaptic basin,  $V(C4,C5)$  and  $V'(C4,C5)$ , integrating 2.79 and 2.62 e, respectively. These bonding changes demand an energy cost of  $18.7 \text{ kcal}\cdot\text{mol}^{-1}$ .

*Phase V* starts at **S4-II**,  $d_{C4-N3} = 2.00 \text{ \AA}$  and  $d_{C5-N1} = 2.20 \text{ \AA}$ , which is characterised for the creation of a new  $V(C4)$  monosynaptic basin, integrating 0.30 e, associated with the formation of a *pseudoradical* center at the C4 carbon. Together with this change, the  $V(C4,C5)$  disynaptic basin undergoes a depopulation of 0.45 e along *Phase IV*. These bonding changes demand an energy cost of  $24.2 \text{ kcal}\cdot\text{mol}^{-1}$ .

*Phase VI* starts at **S5-II**,  $d_{C4-N3} = 1.82 \text{ \AA}$  and  $d_{C5-N1} = 2.08 \text{ \AA}$ . At this structure, the  $V(N3)$  monosynaptic basin presents at **S4-II** is split in two  $V(N3)$  and  $V'(N3)$  monosynaptic basins, integrating 3.46 and 0.39 e, respectively.

*Phase VII* starts at **S6-II**,  $d_{C4-N3} = 1.74 \text{ \AA}$  and  $d_{C5-N1} = 2.02 \text{ \AA}$ , which is characterised for the creation of a new  $V(C5)$  monosynaptic basin, integrating 0.13 e, associated with the formation of a *pseudoradical* center at the C5 carbon. Together with this change, the  $V(C4,C5)$  disynaptic basin undergoes a depopulation of 0.22 e along *Phase VI*. These bonding changes demand an energy cost of  $12.4 \text{ kcal}\cdot\text{mol}^{-1}$ .

Phase VIII starts at **S7-II**,  $d_{C4-N3} = 1.70 \text{ \AA}$  and  $d_{C5-N1} = 1.99 \text{ \AA}$ . At the beginning of this phase the first more relevant change along the IRC takes place. At this structure, while the  $V(C4)$  and  $V'(N3)$  monosynaptic basins are missing, a new  $V(N3,C4)$  disynaptic basin, integrating 1.33 e, is created. These topological changes indicate that the formation of the first N3–C4 single bond has begun at a C–C distance of  $1.70 \text{ \AA}$ , through the C-to-N coupling of the two C4 and N3 *pseudoradicals*.

**Table S2.** ELF valence basin populations, distances of the forming bonds, and relative<sup>a</sup> electronic energies of the gas phase IRC structures **S0-I** – **S8-I** defining the nine phases characterizing the molecular mechanism of the 32CA reaction between phenyl azide **3** with 2-butyne **13** yielding 1,2,3-triazole **14**. Distances are given in angstroms,  $\text{Å}$ , and relative energies in  $\text{kcal}\cdot\text{mol}^{-1}$ .

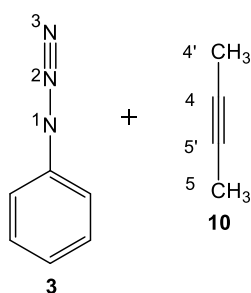

| Phases        | I            | II           | III          | IV           | V            | VI           | VII          | VIII         | IX           |           |
|---------------|--------------|--------------|--------------|--------------|--------------|--------------|--------------|--------------|--------------|-----------|
| Structures    | <b>S0-II</b> | <b>S1-II</b> | <b>S2-II</b> | <b>S3-II</b> | <b>S4-II</b> | <b>S5-II</b> | <b>S6-II</b> | <b>S7-II</b> | <b>S8-II</b> | <b>14</b> |
| $d(C4-N3)$    | 3.017        | 2.780        | 2.534        | 2.317        | 2.002        | 1.823        | 1.743        | 1.697        | 1.623        | 1.350     |
| $d(C5-N1)$    | 2.909        | 2.724        | 2.545        | 2.405        | 2.203        | 2.081        | 2.023        | 1.986        | 1.922        | 1.354     |
| $\Delta E$    | 0.0          | 3.8          | 10.9         | 18.7         | 24.2         | 18.1         | 12.4         | 8.2          | 0.1          | -71.2     |
| $V(N1)$       | 3.30         | 3.27         | 3.25         | 3.27         | 3.31         | 3.32         | 3.31         | 3.31         | 1.98         | 1.16      |
| $V'(N2)$      |              |              | 0.58         | 1.54         | 2.21         | 2.44         | 2.53         | 2.57         | 2.64         | 3.13      |
| $V(N1,N2)$    | 2.52         | 2.49         | 2.34         | 2.09         | 1.81         | 1.78         | 1.79         | 1.78         | 1.79         | 1.75      |
| $V(N2,N3)$    | 1.70         | 4.21         | 3.80         | 3.12         | 2.77         | 2.60         | 2.54         | 2.50         | 2.44         | 2.07      |
| $V'(N2,N3)$   | 2.47         |              |              |              |              |              |              |              |              |           |
| $V(N3)$       | 3.72         | 3.71         | 3.69         | 3.67         | 3.75         | 3.46         | 3.32         | 3.27         | 3.19         | 2.88      |
| $V'(N3)$      |              |              |              |              |              | 0.39         | 0.59         |              |              |           |
| $V(C4,C5)$    | 1.70         | 5.21         | 5.48         | 2.79         | 2.46         | 2.29         | 2.24         | 2.20         | 2.12         | 3.51      |
| $V'(C4,C5)$   | 1.82         | 0.30         |              | 2.62         | 2.50         | 2.38         | 2.21         | 2.17         | 2.13         | --        |
| $V''(C4,C5)$  | 1.91         |              |              |              |              |              |              |              |              |           |
| $V'''(C4,C5)$ | 0.10         |              |              |              |              |              |              |              |              |           |
| $V(C4,C4')$   | 2.16         | 2.17         | 2.18         | 2.20         | 2.24         | 2.20         | 2.16         | 2.15         | 2.13         | 2.06      |
| $V(C5,C5')$   | 2.15         | 2.16         | 2.17         | 2.18         | 2.13         | 2.07         | 2.06         | 2.06         | 2.05         | 2.08      |
| $V(C4)$       |              |              |              |              | 0.30         | 0.55         | 0.62         |              |              |           |
| $V(C5)$       |              |              |              |              |              |              | 0.13         | 0.16         |              |           |
| $V(C4,N3)$    |              |              |              |              |              |              |              | 1.33         | 1.51         | 2.28      |
| $V(C5,N1)$    |              |              |              |              |              |              |              |              | 1.54         | 2.41      |

Finally, the last *Phase IX* starts at **S8-II**,  $d_{C4-N3} = 1.62 \text{ \AA}$  and  $d_{C5-N1} = 1.92 \text{ \AA}$ , and ends at 1,2,3-triazole **14**,  $d_{C4-N3} = 1.35 \text{ \AA}$  and  $d_{C5-N1} = 1.35 \text{ \AA}$ . At **S8-II** the second more relevant change along the IRC takes place. At this structure, while the V(C5) monosynaptic basin is missing, a new V(N1,C5) disynaptic basin, integrating 1.54 e, is created. These relevant topological changes indicate that the formation of the second C5–N1 single bond has begun, through the C-to-N coupling of the electron density of the C5 *pseudoradical* carbon (integrating 0.16 e) and part of the non-bonding electron density of the N1 nitrogen. Along this last phase, the molecular electron density is relaxed to reach the structure of 1,2,3-triazole **14**, in which the population of the V(N3,C4) and V(N1,C5) disynaptic basins reach a population of 2.28 and 2.41 e, respectively.

## References

1. X. Krokidis, S. Noury and B. Silvi, *J. Phys. Chem. A*, 1997, **101**, 7277-7282.
2. A. D. Becke and K. E. Edgecombe, *J. Chem. Phys.*, 1990, **92**, 5397-5403.
3. B. Silvi and A. Savin, *Nature*, 1994, **371**, 683- 686.
4. (a) Thom, R. *Stabilité Structurelle et Morphogénèse*; Interditions, Paris, 1972; (b) A. E. R. Woodcock, T. A. Poston in *Geometrical Study of Elementary Catastrophes*, Spinger-Verlag, Berlin, 1974.
5. (a) V. Polo, J. Andrés, S. Berski, L. R. Domingo and B. Silvi, *J. Phys. Chem. A*. 2008, **112** 7128-7136; (b) J. Andrés, P. González-Navarrete and V. Safont, *Int. J. Quantum Chem.* 2014, **114**, 1239-1252; (c) J. Andrés, S. Berski, L.R. Domingo, V. Polo and B. Silvi. *Curr. Org. Chem.* 2011, **15**, 3566-3575.



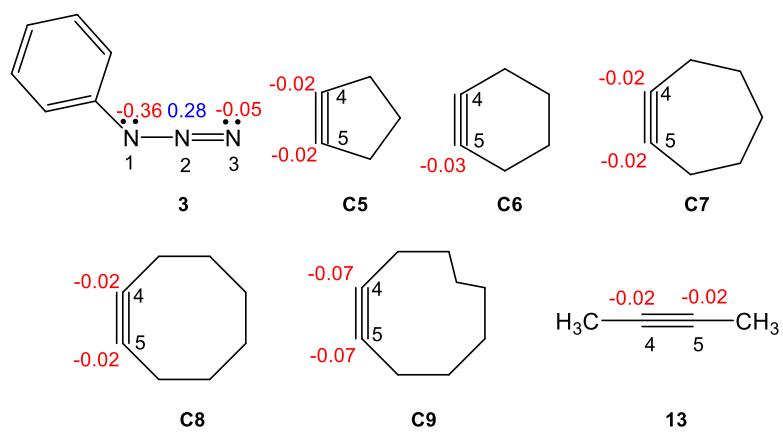

**Figure S1.** MPWB1K/6-311G(d) calculated gas phase natural atomic charges, in average number of electrons  $e$ , of phenyl azide **3**, cycloalkynes series **C5 - C9** and 2-butyne **13**. Negative charges are coloured in red, and positive charges in blue.

**Table S3.** MPWB1K/6-311G(d,p) calculated gas phase electronic chemical potential  $\mu$ , chemical hardness  $\eta$ , global electrophilicity  $\omega$  and global nucleophilicity  $N$ , in eV, of phenyl azide **3**, cycloalkyne series **C5 - C9** and 2-butyne **13**.

|           | $\mu$ | $\eta$ | $\omega$ | $N$  |
|-----------|-------|--------|----------|------|
| <b>3</b>  | -3.62 | 7.18   | 0.91     | 3.18 |
| <b>C5</b> | -4.66 | 6.11   | 1.78     | 2.68 |
| <b>C6</b> | -3.82 | 7.59   | 0.96     | 2.78 |
| <b>C7</b> | -3.27 | 8.65   | 0.62     | 2.80 |
| <b>C8</b> | -2.94 | 9.63   | 0.45     | 2.64 |
| <b>C9</b> | -2.91 | 9.80   | 0.43     | 2.58 |
| <b>13</b> | -2.78 | 10.23  | 0.38     | 2.50 |

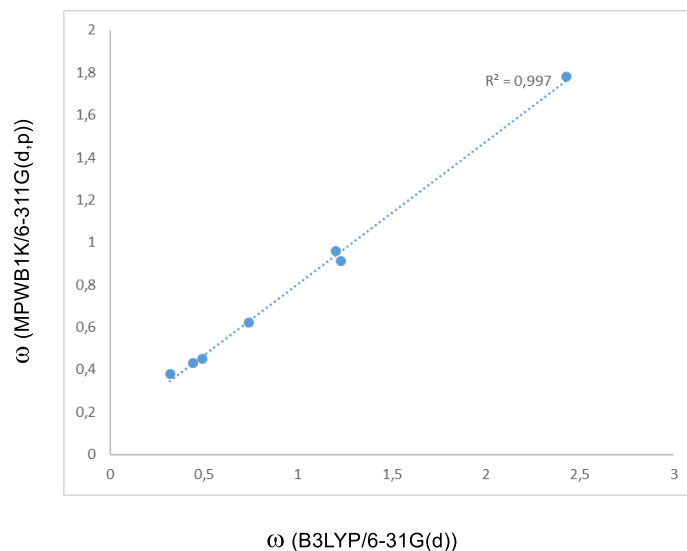

**Figure S2.** Plot of the MPWB1K/6-311G(d,p) gas phase electrophilicity  $\omega$  indices vs the B3LYP/6-31G(d) ones of phenyl azide **3**, cycloalkyne series **C5 - C9** and 2-butyne **13**.

**Table S4.** MPWB1K/6-311G(d,p) calculated electronic energies, E in a.u., enthalpies, H in a.u., and Gibbs free energies, G in a.u., computed at 298 K in gas phase, of the stationary points involved in the 32CA reactions of phenyl azide **3** with cycloalkyne series **C5** - **C9** and 2-butyne **13**.

|            | E           | H           | G           |
|------------|-------------|-------------|-------------|
| <b>3</b>   | -395.726968 | -395.612629 | -395.652220 |
| <b>C5</b>  | -193.895898 | -193.797192 | 193.829793  |
| <b>C6</b>  | -233.253251 | -233.122345 | -233.157246 |
| <b>C7</b>  | -272.580026 | -272.417963 | -272.455134 |
| <b>C8</b>  | -311.894748 | -311.701556 | -311.741219 |
| <b>C9</b>  | -351.201515 | -350.977942 | -351.019508 |
| <b>13</b>  | -155.919626 | -155.826896 | -155.863417 |
| <b>TS1</b> | -589.631925 | -589.417555 | -589.473779 |
| <b>8</b>   | -589.843793 | -589.622840 | -589.671029 |
| <b>TS2</b> | -628.974200 | -628.728121 | -628.783426 |
| <b>9</b>   | -629.163459 | -628.911488 | -628.961484 |
| <b>TS3</b> | -668.292664 | -668.016731 | -668.071962 |
| <b>10</b>  | -668.460498 | -668.178074 | -668.230810 |
| <b>TS4</b> | -707.598896 | -707.291223 | -707.351616 |
| <b>11</b>  | -707.751148 | -707.437731 | -707.492988 |
| <b>TS5</b> | -746.900217 | -746.562602 | -746.621276 |
| <b>12</b>  | -747.047856 | -746.704090 | -746.761249 |
| <b>TS6</b> | -551.607718 | -551.400112 | -551.452673 |
| <b>14</b>  | -551.760068 | -551.546929 | -551.596012 |

**Table S5.** MPWB1K/6-311G(d,p) calculated electronic energies, E in a.u., enthalpies, H in a.u., and Gibbs free energies, G in a.u., computed at 298 K in acetonitrile, of the stationary points involved in the 32CA reactions of phenyl azide **3** with cycloalkyne series **C5** - **C9** and 2-butyne **13**.

|            | E           | H           | G           |
|------------|-------------|-------------|-------------|
| <b>3</b>   | -395.735105 | -395.621680 | -395.661304 |
| <b>C5</b>  | -193.899214 | -193.800683 | -193.833386 |
| <b>C6</b>  | -233.258460 | -233.128128 | -233.163170 |
| <b>C7</b>  | -272.584897 | -272.423436 | -272.460637 |
| <b>C8</b>  | -311.899348 | -311.706804 | -311.746457 |
| <b>C9</b>  | -351.205865 | -350.982974 | -351.024528 |
| <b>13</b>  | -155.922991 | -155.831421 | -155.863661 |
| <b>TS1</b> | -589.643586 | -589.429140 | -589.485085 |
| <b>8</b>   | -589.854209 | -589.633309 | -589.681491 |
| <b>TS2</b> | -628.984832 | -628.739937 | -628.794909 |
| <b>9</b>   | -629.179176 | -628.928436 | -628.978679 |
| <b>TS3</b> | -668.303597 | -668.027900 | -668.084768 |
| <b>10</b>  | -668.476697 | -668.195283 | -668.247856 |
| <b>TS4</b> | -707.608430 | -707.302116 | -707.362018 |
| <b>11</b>  | -707.767717 | -707.455634 | -707.511066 |
| <b>TS5</b> | -746.910277 | -746.572932 | -746.633552 |
| <b>12</b>  | -747.063787 | -746.721110 | -746.778426 |
| <b>TS6</b> | -551.616071 | -551.409372 | -551.461748 |
| <b>14</b>  | -551.775026 | -551.563334 | -551.613718 |
